# Supplementary material for: Real-time topic-aware influence maximization using preprocessing
Source: Springer Nature journal article supplement (doi:10.1186/s40649-016-0033-z), 2016-11-10
Supplement: 40649_2016_33_MOESM1_ESM.pdf [file 40649_2016_33_MOESM1_ESM.pdf]

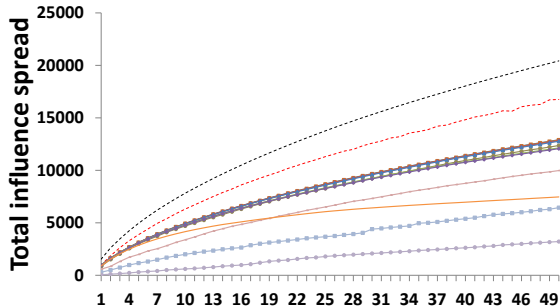

Number of seeds

- - OfflineBound      - - OnlineBound      - - TA-Greedy  
 - - MIS[Greedy]      - - TA-PMIA      - - MIS[PMIA]  
 - - TA-WeightedDegree      - - BTS[Greedy]      - - BTS[PMIA]  
 - - TA-Pagerank      - - TO-Greedy      - - TO-Degree  
 - - Random

(a) Arnetminer on random samples

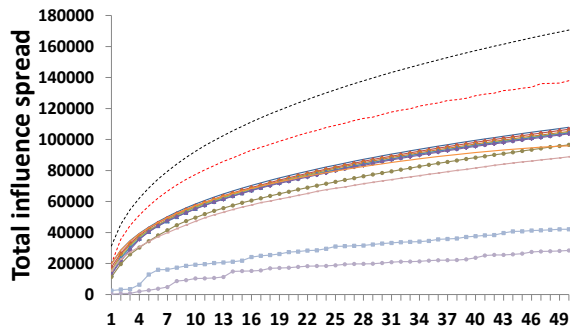

Number of seeds

- - OfflineBound      - - OnlineBound      - - TA-Greedy  
 - - TA-PMIA      - - MIS[Greedy]      - - BTS[Greedy]  
 - - MIS[PMIA]      - - BTS[PMIA]      - - TA-WeightedDegree  
 - - TO-Greedy      - - TA-Pagerank      - - TO-Degree  
 - - Random

(b) Flixster on random samples

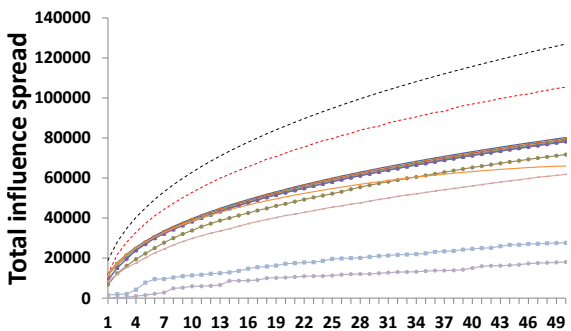

Number of seeds

- - OfflineBound      - - OnlineBound      - - TA-Greedy  
 - - TA-PMIA      - - MIS[Greedy]      - - BTS[Greedy]  
 - - MIS[PMIA]      - - BTS[PMIA]      - - TA-WeightedDegree  
 - - TO-Greedy      - - TA-Pagerank      - - TO-Degree  
 - - Random

(c) Flixster on Dirichlet samples

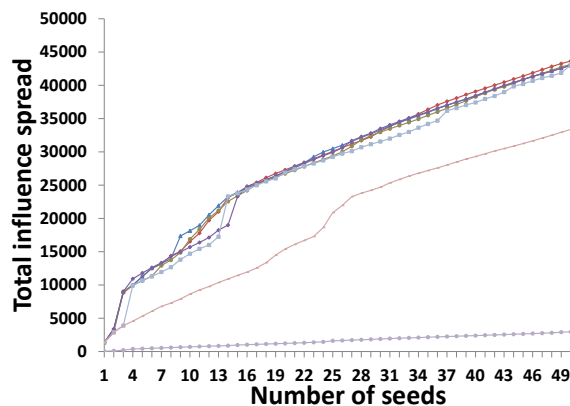

Number of seeds

- - TA-PMIA      - - MIS[PMIA]      - - TA-WeightedDegree  
 - - BTS[PMIA]      - - TO-Degree      - - TA-Pagerank  
 - - Random

(d) DBLP on random samples
